# Supplementary material
Source: PubMed Central journal article supplement (PMC3071300)

# Supplementary Figure 1

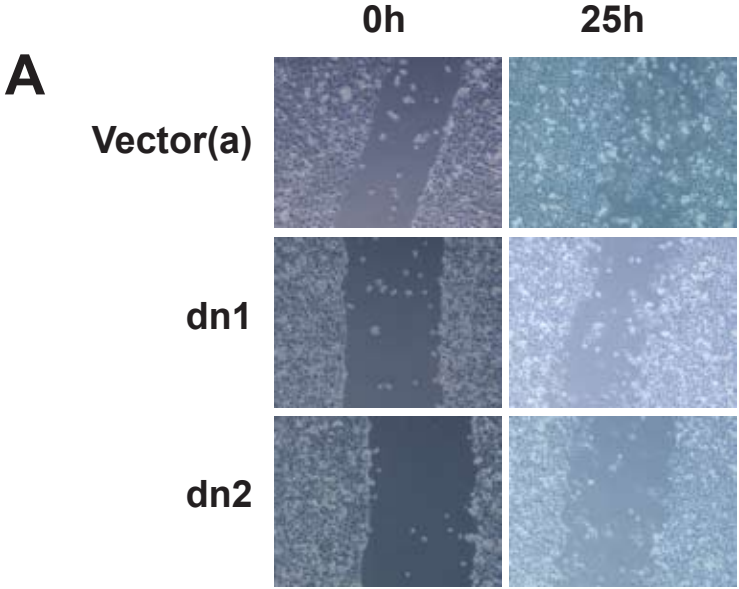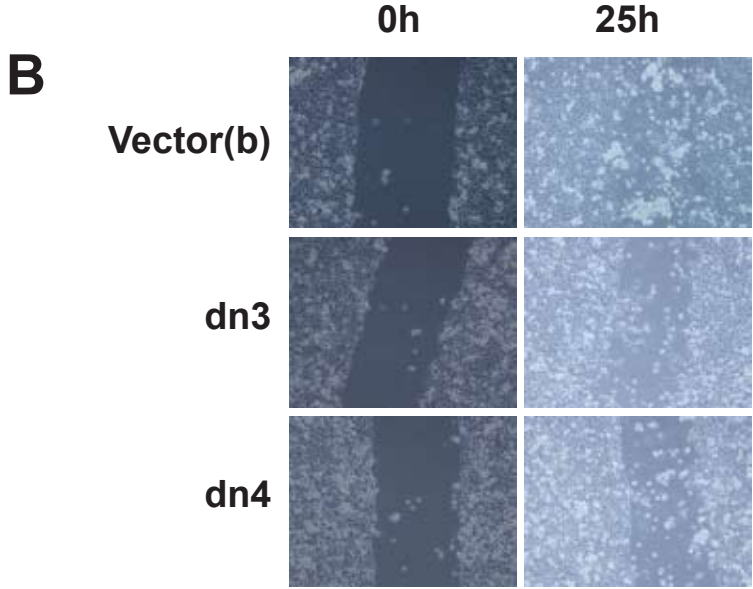

Supplement: NIHMS268041-supplement-1.pdf [file NIHMS268041-supplement-1.pdf]

# Supplementary Figure 8

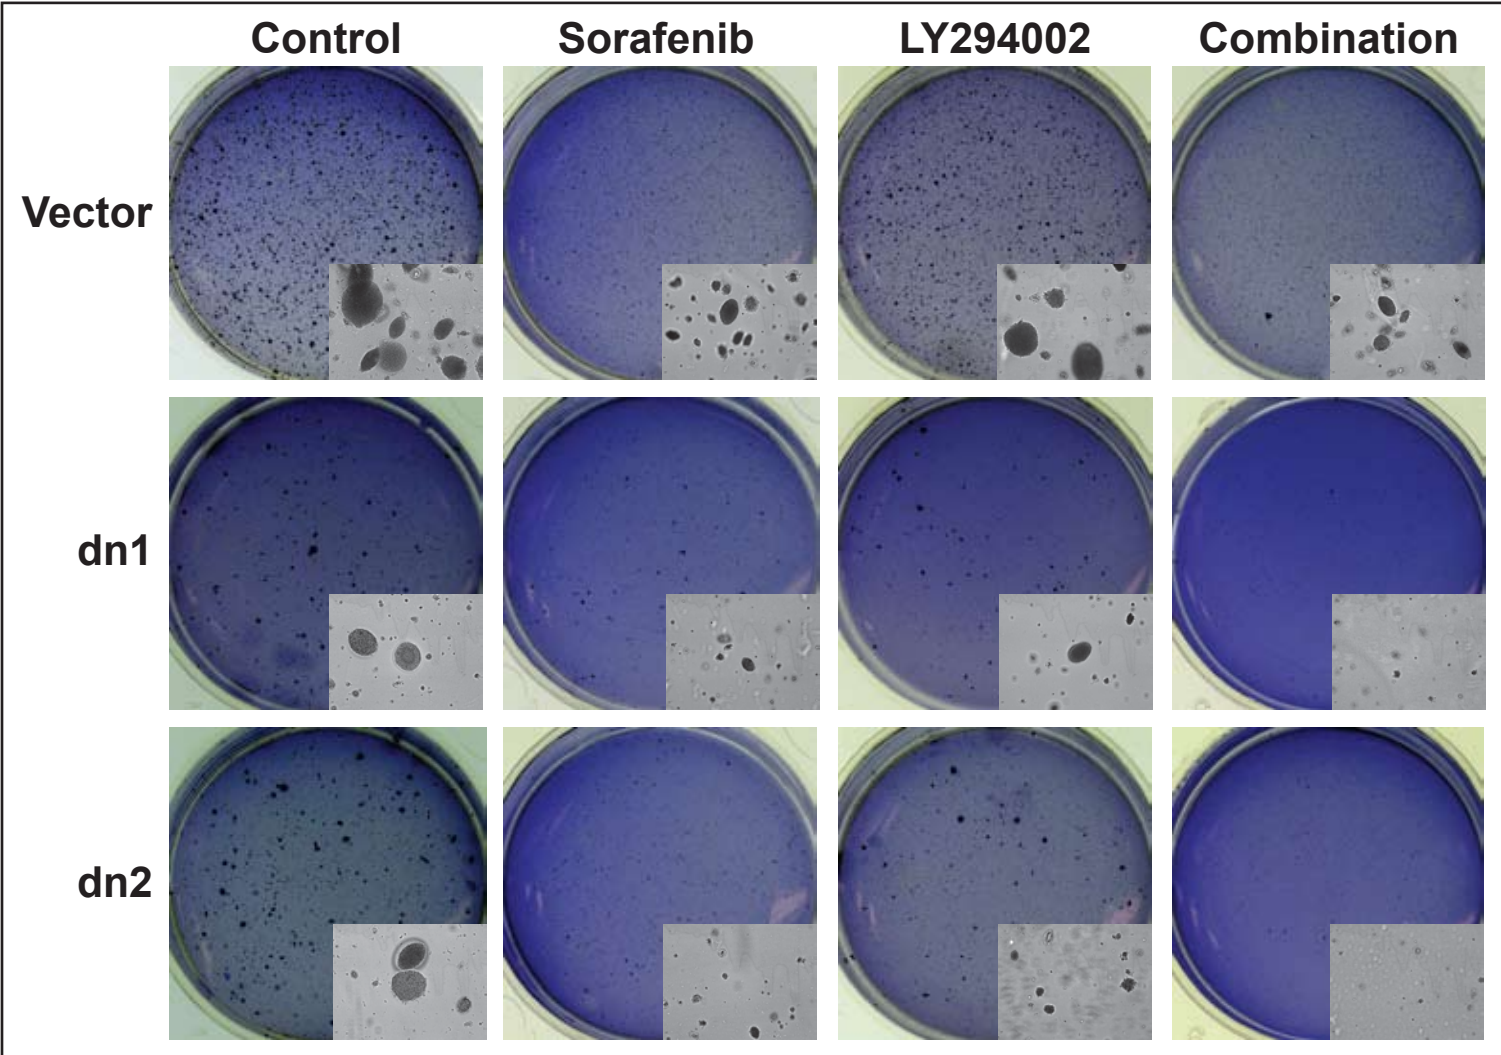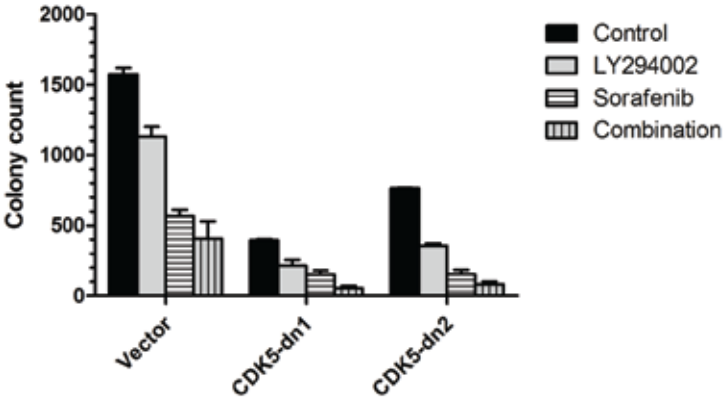

Supplement: NIHMS268041-supplement-10.pdf [file NIHMS268041-supplement-10.pdf]

# Supplementary Figure 2

## A

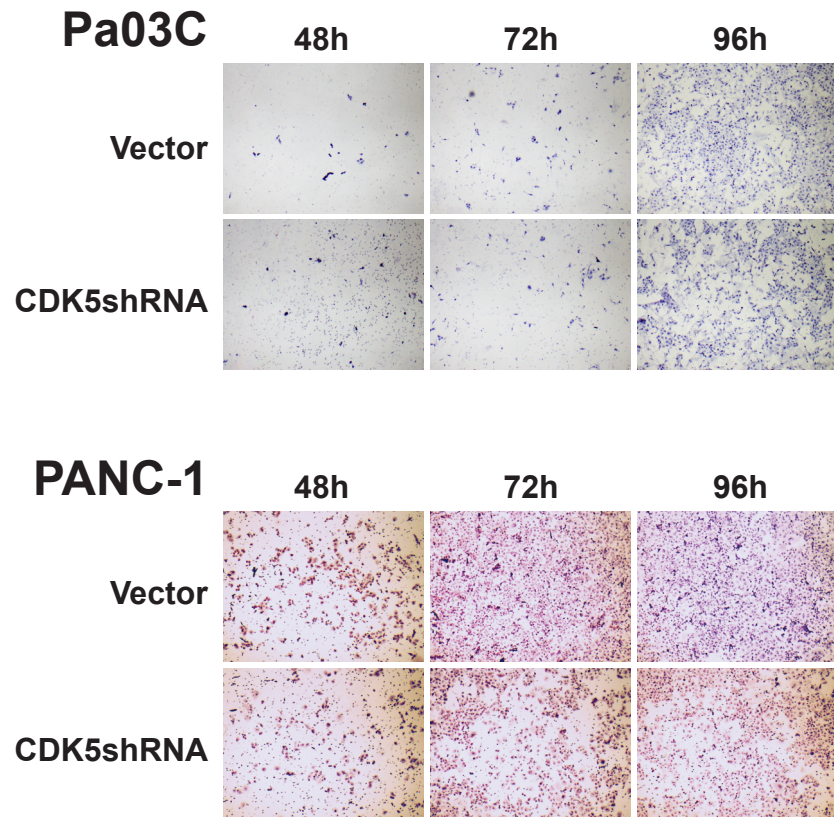

## B

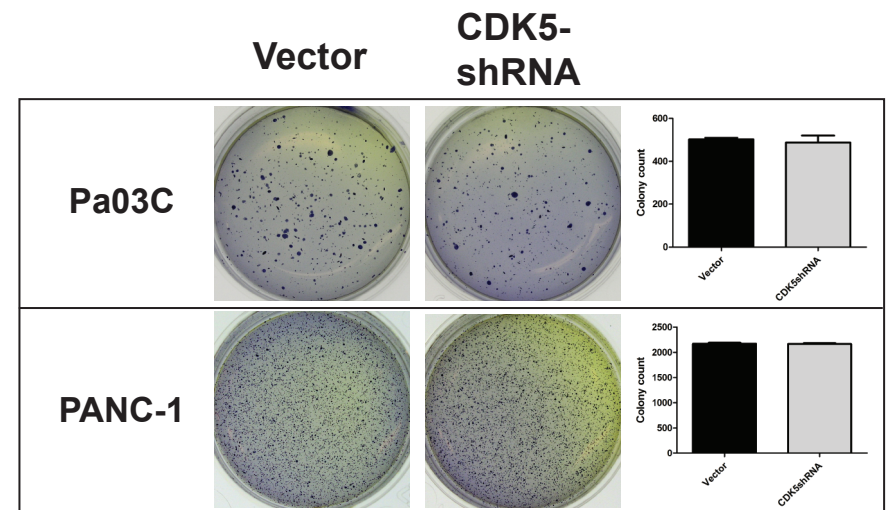

Supplement: NIHMS268041-supplement-5.pdf [file NIHMS268041-supplement-5.pdf]

## Supplementary Figure 6

**A**

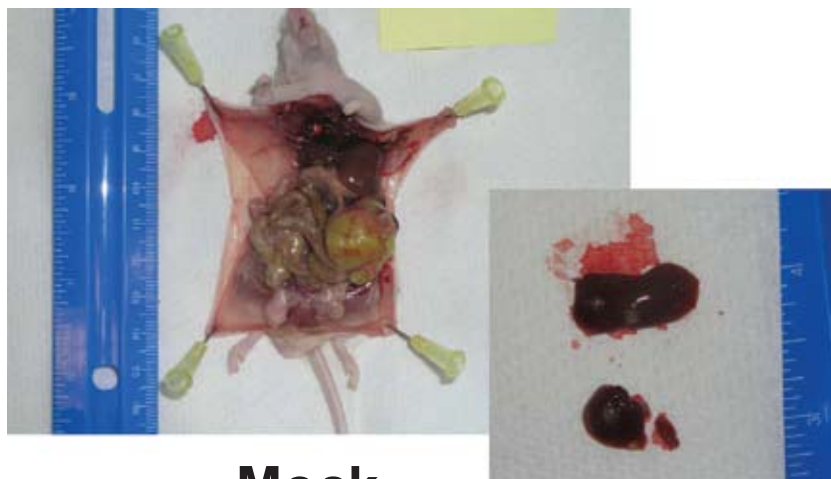

**Mock**

**B**

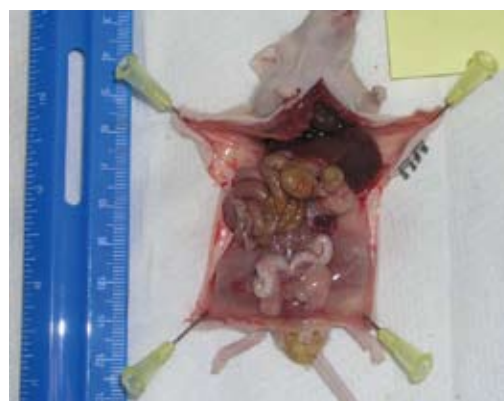

**p35shRNA**

**C**

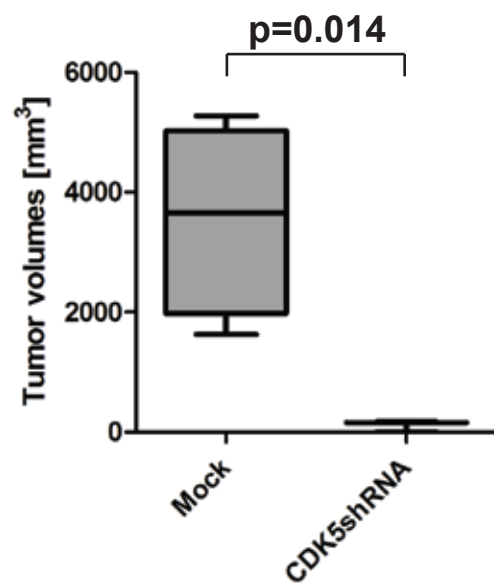

Supplement: NIHMS268041-supplement-6.pdf [file NIHMS268041-supplement-6.pdf]

# Supplementary Figure 4

## A

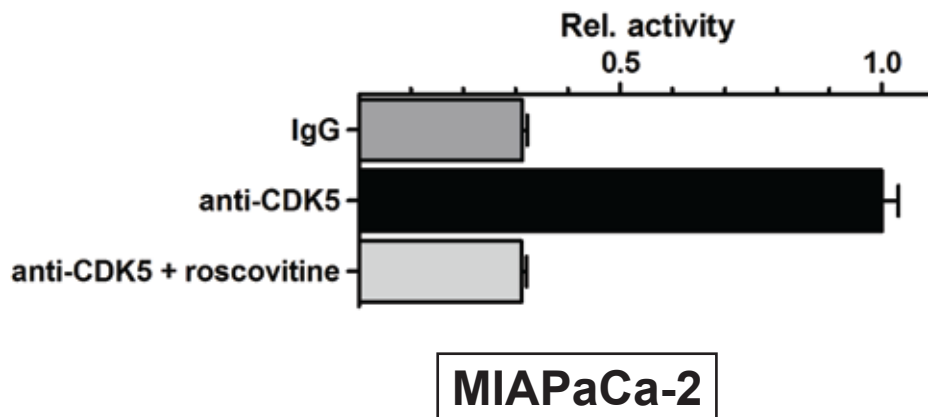

## B

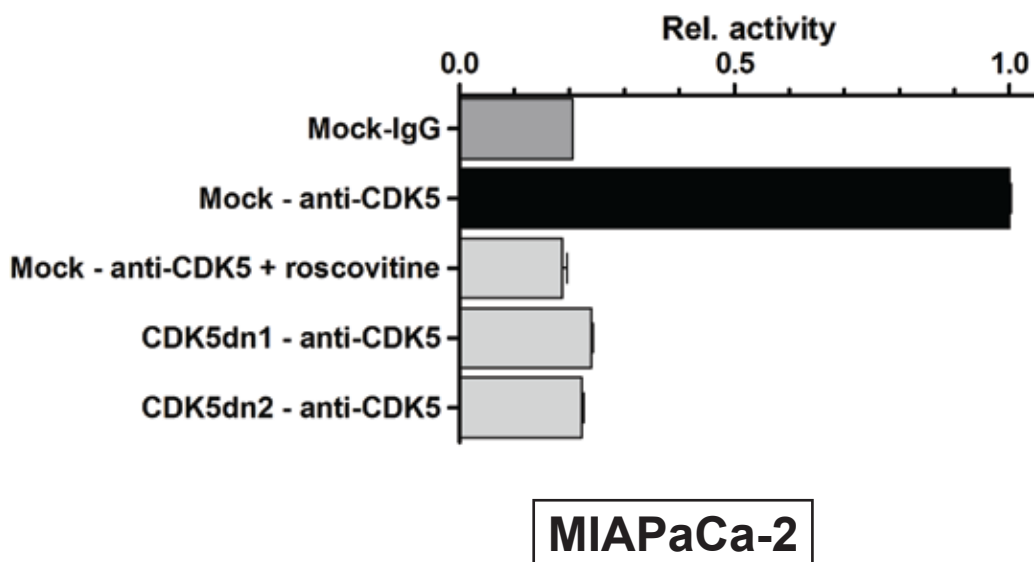

Supplement: NIHMS268041-supplement-7.pdf [file NIHMS268041-supplement-7.pdf]

# Supplementary Figure 5

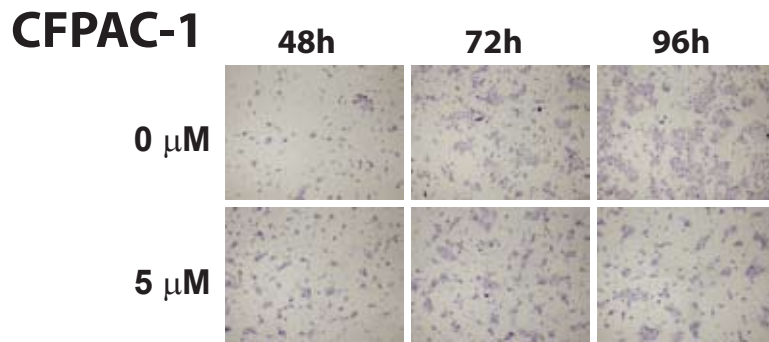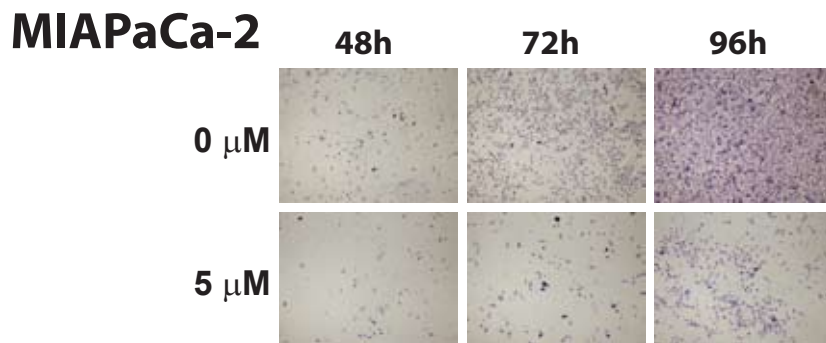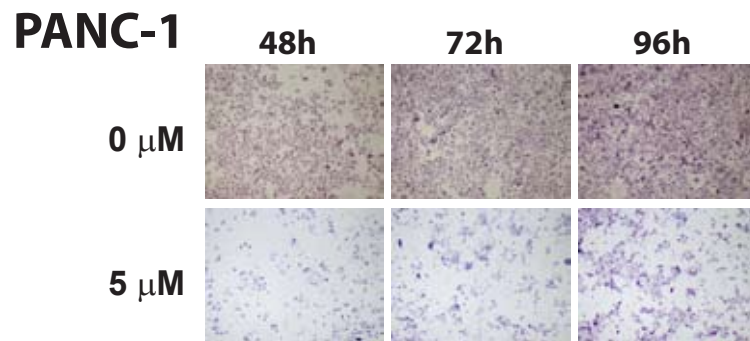

Supplement: NIHMS268041-supplement-8.pdf [file NIHMS268041-supplement-8.pdf]

# Supplementary Figure 7

**A**

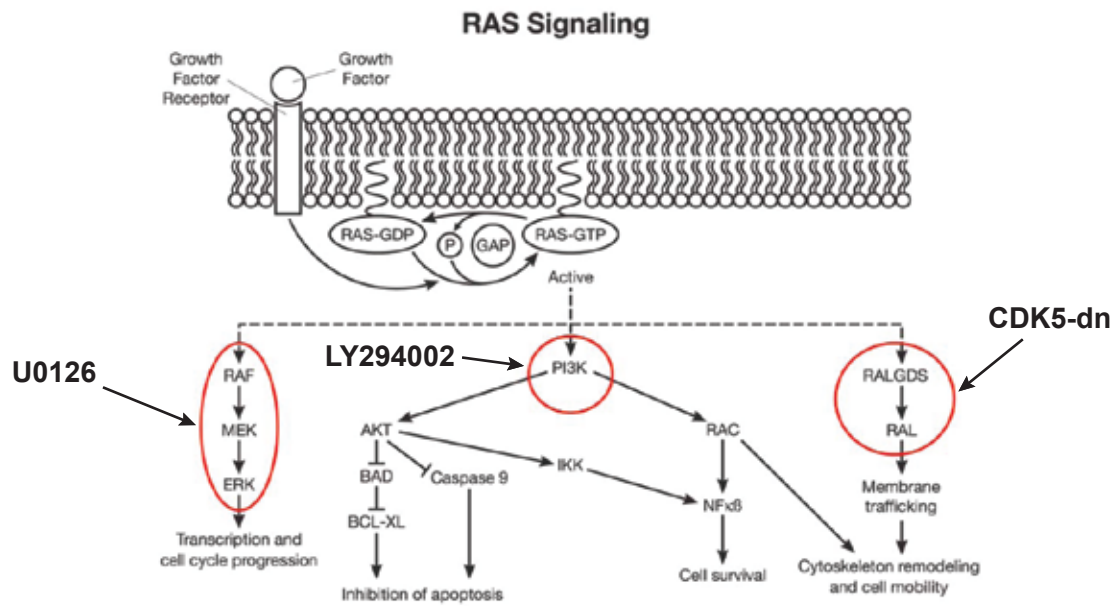

**B**

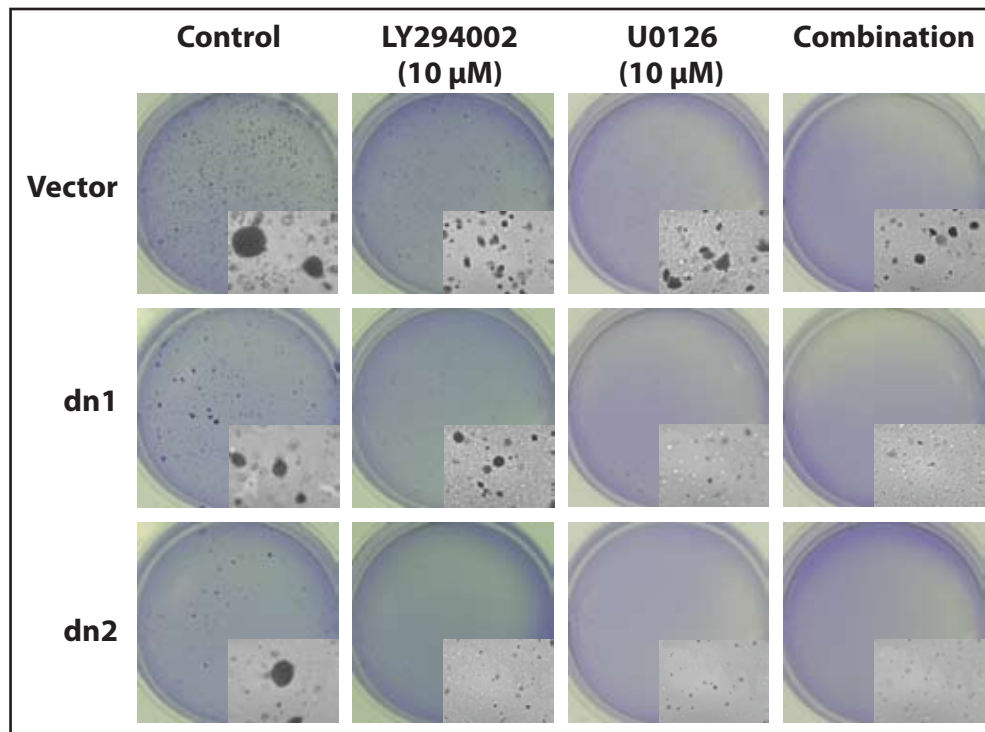

p=0.0068  
NS (p=0.0703)

**C**

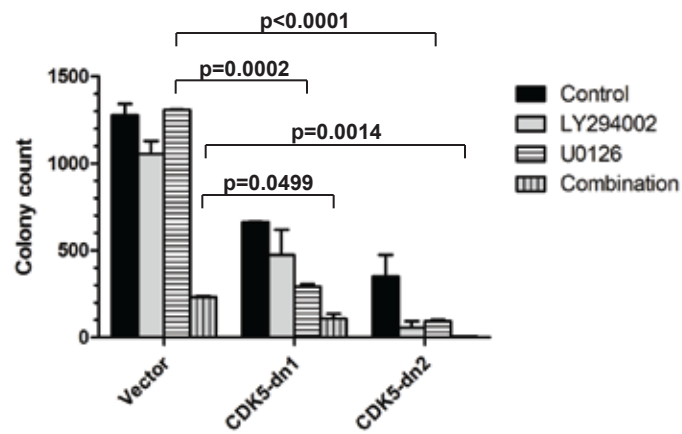

Supplement: NIHMS268041-supplement-9.pdf [file NIHMS268041-supplement-9.pdf]
